# Supplementary material for: Facet-dependent adsorption of safranin dye and phosphate ions by synthesized hematite nanorods derived from natural lateritic iron ore: steric and energetic investigations
Source: Royal Society of Chemistry journal article supplement (doi:10.1039/d4nj04152f), 2024-01-01
Supplement: d4nj04152f1.pdf [file d4nj04152f1.pdf]

Table.S1. Nonlinear equations of kinetic, classic isotherm, and advanced isotherm models

| Kinetic models                                     |                                                                                                              |                                                                                                                                                                                                                                                                         |
|----------------------------------------------------|--------------------------------------------------------------------------------------------------------------|-------------------------------------------------------------------------------------------------------------------------------------------------------------------------------------------------------------------------------------------------------------------------|
| Model                                              | Equation                                                                                                     | Parameters                                                                                                                                                                                                                                                              |
| Pseudo-first-order                                 | $Q_t = Q_e (1 - e^{-k_1 t})$                                                                                 | $Q_t$ (mg/g) is the adsorbed ions at time (t), and $K_1$ is the rate constant of the first-order adsorption (1/min)                                                                                                                                                     |
| Pseudo-second-order                                | $Q_t = \frac{Q_e^2 k_2 t}{1 + Q_e k_2 t}$                                                                    | $Q_e$ is the quantity of adsorbed ions after equilibration (mg/g), and $K_2$ is the model rate constant (g/mg min).                                                                                                                                                     |
| Classic Isotherm models                            |                                                                                                              |                                                                                                                                                                                                                                                                         |
| Model                                              | Equation                                                                                                     | Parameters                                                                                                                                                                                                                                                              |
| Langmuir                                           | $Q_e = \frac{Q_{max} b C_e}{(1 + b C_e)}$                                                                    | $C_e$ is the rest ions concentrations (mg/L), $Q_{max}$ is the theoretical maximum adsorption capacity (mg/g), and $b$ is the Langmuir constant (L/mg)                                                                                                                  |
| Freundlich                                         | $Q_e = K_f C_e^{1/n}$                                                                                        | $K_f$ (mg/g) is the constant of Freundlich model related to the adsorption capacity and $n$ is the constant of Freundlich model related to the adsorption intensities                                                                                                   |
| Dubinin–Radushkevich                               | $Q_e = Q_m e^{-\beta \epsilon^2}$                                                                            | $\beta$ (mol <sup>2</sup> /KJ <sup>2</sup> ) is the D-R constant, $\epsilon$ (KJ <sup>2</sup> /mol <sup>2</sup> ) is the polanyi potential, and $Q_m$ is the adsorption capacity (mg/g)                                                                                 |
| Advanced isotherm models                           |                                                                                                              |                                                                                                                                                                                                                                                                         |
| Model                                              | Equation                                                                                                     | Parameters                                                                                                                                                                                                                                                              |
| Monolayer model with one energy site (Model 1)     | $Q = n N_o = \frac{n N_M}{1 + (\frac{C1/2}{C})^n} = \frac{Q_o}{1 + (\frac{C1/2}{C})^n}$                      | $Q$ is the adsorbed quantities in mg/g<br>$n$ is the number of adsorbed ion per site<br>$N_m$ is the density of the effective receptor sites (mg/g)                                                                                                                     |
| Monolayer model with two energy sites (Model 2)    | $Q = \frac{n_1 N_{1M}}{1 + (\frac{C_1}{C})^{n_1}} + \frac{n_2 N_{2M}}{1 + (\frac{C_2}{C})^{n_2}}$            | $Q_o$ is the adsorption capacity at the saturation state in mg/g<br>$C1/2$ is the concentration of the ions at half saturation stage in mg/L                                                                                                                            |
| Double layer model with one energy site (Model 3)  | $Q = Q_o \frac{(\frac{C}{C1/2})^n + 2(\frac{C}{C1/2})^{2n}}{1 + (\frac{C}{C1/2})^n + (\frac{C}{C1/2})^{2n}}$ | $C1$ and $C2$ are the concentrations of the ions at the half saturation stage for the first active sites and the second active sites, respectively<br>$n1$ and $n2$ are the adsorbed ions per site for the first active sites and the second active sites, respectively |
| Double layer model with two energy sites (Model 3) | $Q = Q_o \frac{(\frac{C}{C1})^n + 2(\frac{C}{C2})^{2n}}{1 + (\frac{C}{C1})^n + (\frac{C}{C2})^{2n}}$         |                                                                                                                                                                                                                                                                         |

**Table.S2.** Comparison study between the developed Mth/EXG as adsorbent and other adsorbents in literature

| Adsorbent                             | $q_{\max}$ (mg/g) | References               |
|---------------------------------------|-------------------|--------------------------|
| <b>SFR</b>                            |                   |                          |
| Ppy NF/Zn-Fe LDH                      | 63.4              | Mohamed et al., (2018)   |
| Glass-MCM-48                          | 62.5              | Abukhadra et al., (2019) |
| MCM-41                                | 68.8              | Kaur et al., (2015)      |
| MgO-FLG-FE                            | 201.1             | Reddy et al., (2018)     |
| CuO-NP                                | 189.5             | Vidovix et al., (2021)   |
| N/porous graphite                     | 20.66             | Shaban et al., (2017)    |
| Sepiolite                             | 233.81            | Barhdadi et al., (2024)  |
| Ferruginous kaolinite                 | 59.3              | Debnath et al., (2017)   |
| <b>HM24</b>                           | <b>211.4</b>      | <b>This study</b>        |
| <b>PO<sub>4</sub><sup>3-</sup></b>    |                   |                          |
| Lanthanum hydroxides                  | 107.5             | Xie et al., (2014)       |
| La doping magnetic graphene           | 116.28            | Nodeh et al., (2017)     |
| Biochar                               | 133               | Yao et al., (2011)       |
| Red mud-chitosan microspheres         | 23.54             | Tandekar et al., (2021)  |
| Mg(OH) <sub>2</sub> /ZrO <sub>2</sub> | 87.2              | Lin et al., (2019)       |
| Zirconia/graphite oxide               | 149.3             | Zong et al., (2013)      |
| ZrO <sub>2</sub> nanoparticles        | 99                | Su et al., (2013)        |
| La <sub>100</sub> SBA-15              | 45.6              | Yang et al., (2011)      |
| Hydrous zirconium oxide               | 51.8              | Lin et al., (2017)       |
| Calcined Mg-Al-LDHs                   | 40.78             | Das et al., (2006)       |
| Kaolintic clay                        | 38.46             | Hamdi and Srasra, 2012   |
| <b>HM24</b>                           | <b>148</b>        | <b>This study</b>        |
